# Supplementary material for: ARTEMIDA Trial (A Randomized Trial of Efficacy, 12 Months International Double-Blind Actovegin): A Randomized Controlled Trial to Assess the Efficacy of Actovegin in Poststroke Cognitive Impairment
Source: PubMed Central journal article supplement — Stroke. 2017 Apr 24;48(5):1262–70. doi: 10.1161/STROKEAHA.116.014321 (PMC5404405; doi:10.1161/strokeaha.116.014321), 2017-04-24
Supplement: str-48-1262-s001.pdf [file str-48-1262-s001.pdf]

## **SUPPLEMENTAL MATERIAL**

### **ARTEMIDA: a randomized controlled trial to assess the efficacy and safety of**

### **Actovegin in post-stroke cognitive impairment**

Alla Guekht,<sup>1\*</sup> Ingmar Skoog,<sup>2</sup> Sally Edmundson,<sup>3</sup> Vladimir Zakharov,<sup>4</sup> Amos D Korczyn,<sup>5</sup>

<sup>1</sup>Department of Neurology, Neurosurgery and Genetics, Russian National Research Medical University, Moscow; Moscow Research and Clinical Center for Neuropsychiatry, Russia

<sup>2</sup>Sahlgrenska Academy, University of Gothenburg, Gothenburg, Sweden

<sup>3</sup>Takeda Development Centre Europe, London, UK

<sup>4</sup>Department of Neurology, 1<sup>st</sup> Moscow State Medical University, Moscow, Russia

<sup>5</sup>Department of Neurology, Tel Aviv University, Tel Aviv, Israel

\*Corresponding author:

Prof. Alla Guekht, Department of Neurology, Neurosurgery and Genetics

Russian National Research Medical University

Moscow; Moscow Research and Clinical Center for Neuropsychiatry

Donskaya Street 43, Moscow 115419, Russia

Email: [guekht@mail.ru](mailto:guekht@mail.ru)

## Contents

|                                                                                                                                            |    |
|--------------------------------------------------------------------------------------------------------------------------------------------|----|
| Supplemental Figure I: Study design .....                                                                                                  | 3  |
| Supplemental Table I: Full list of investigators and study centers .....                                                                   | 4  |
| Supplemental Table II: Full list of inclusion criteria .....                                                                               | 10 |
| Supplemental Table III: Full list of exclusion criteria .....                                                                              | 11 |
| Supplemental Table IV: Full list of medications prohibited during double-blind treatment .....                                             | 13 |
| Supplemental Table V: All primary, secondary and safety endpoints .....                                                                    | 14 |
| Supplemental Table VI: Key protocol deviations occurring in more than one patient.....                                                     | 15 |
| Supplemental Table VII: Summary of primary and key secondary outcomes in the ITT population. .                                             | 16 |
| Supplemental Table VIII: Summary of EuroQol EQ-5D at 6 Months and 12 Months .....                                                          | 17 |
| Supplemental Table IX: Summary of patients with clinically significant chemistry laboratory values<br>by visit (safety analysis set) ..... | 19 |
| Supplemental Table X: Summary of TEAEs related to chemistry laboratory results (safety analysis<br>set).....                               | 20 |
| Supplemental Table XI: Overview of TEAEs (safety analysis set).....                                                                        | 21 |
| Supplemental Table XII: Overview of TEAEs related to recurrent cerebrovascular events (safety<br>analysis set).....                        | 22 |
| Randomization and masking Full Methods .....                                                                                               | 23 |
| Per protocol (PP) analyses .....                                                                                                           | 23 |
| Further Safety Results.....                                                                                                                | 23 |
| Authors' contributions .....                                                                                                               | 24 |

### Supplemental Figure I: Study design

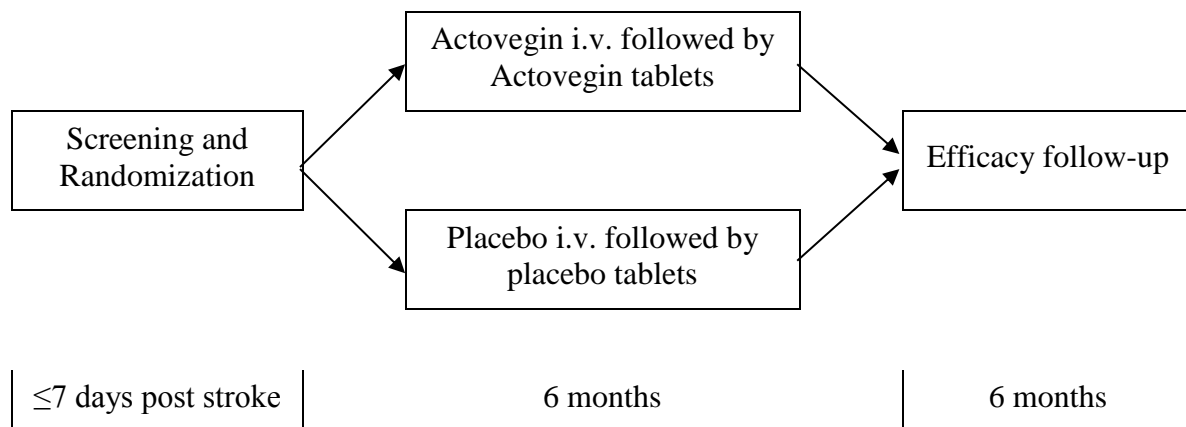

Subjects who had suffered ischemic stroke were randomized to receive either Actovegin or placebo in a 1:1 ratio within 5 to 7 days following the stroke onset. The trial consisted of a screening period (up to 6 days), followed by a randomized treatment period (up to 20 intravenous [i.v.] daily infusions, then tablets for the remainder of the 6-month treatment period), ending with a 6-month efficacy follow-up period (where subjects were allowed to undergo treatment in accordance with standard clinical practice).

**Supplemental Table I: Full list of investigators and study centers**

| <b>Investigator</b>       | <b>Centre number, address</b>                                                                                                                                                                                                                                            | <b>Number of patients randomized</b> |
|---------------------------|--------------------------------------------------------------------------------------------------------------------------------------------------------------------------------------------------------------------------------------------------------------------------|--------------------------------------|
| <b>Russia</b>             |                                                                                                                                                                                                                                                                          |                                      |
| Dr. Larisa Voronkova      | St. Petersburg State Budgeted Healthcare Institution “City Hospital#26”, 2 Kostyushko str., 196247, St. Petersburg, Russia                                                                                                                                               | 41                                   |
| Dr. Alina Agafyina        | St. Petersburg State Budgeted Healthcare Institution of Resort District City Hospital #40<br>9 Borisova str., 191014, St. Petersburg, Russia                                                                                                                             | 37                                   |
| Dr. Lyudmila Roshkovskaya | St. Petersburg State Budgeted Healthcare Institution Nikolaevskaya Hospital<br>1 Konstantinovskaya str., Petrodvorets, 198510, Saint-Petersburg, Russia                                                                                                                  | 24                                   |
| Dr. Konstantin V. Golikov | Saint Petersburg State Budgetary Healthcare Institution "City Multifield Hospital #2", 5, Uchebny per., St. Petersburg, 194354, Russia                                                                                                                                   | 23                                   |
| Prof. Eduard Z. Yakupov   | Scientific research medical complex “Your Health” LLC, 7, Zinina str., Kazan, 420097, Russia<br><u>Clinical base:</u> Municipal Healthcare Institution “City Emergency Hospital #2”, therapy and neurology department, 31, Lieutenant Shmidt str., Kazan, 420097, Russia | 23                                   |
| Prof. Irina Poverennova   | State Budgetary Healthcare Institution “Samara Region Clinical Hospital named after M.I. Kalinin”<br>159, Tashkentskaya str, Samara, 443095, Russia                                                                                                                      | 23                                   |
| Dr. Elena Vostrikova      | Municipal Budgetary Healthcare Institution of Novosibirsk “City Clinical Hospital#34”, 18, Titova str., Novosibirsk, Novosibirsk region, 630054, Russia                                                                                                                  | 22                                   |

|                            |                                                                                                                                                                                                                                                                                                                                                                                                                                                               |    |
|----------------------------|---------------------------------------------------------------------------------------------------------------------------------------------------------------------------------------------------------------------------------------------------------------------------------------------------------------------------------------------------------------------------------------------------------------------------------------------------------------|----|
| Prof. Dina R. Khasanova    | State Autonomous Healthcare Institution Interregional Clinical Diagnostic Centre 12a Karbysheva str., Kazan, 420101, Russia                                                                                                                                                                                                                                                                                                                                   | 19 |
| Prof. Enver I. Bogdanov    | State Budgetary Educational Institution of Higher Professional Education Kazan State Medical University of the Ministry of Healthcare and Social Development of the Russian Federation, 49 Butlerova str., Kazan, 420012, Tatarstan Republic, Russia<br><u>Clinical base:</u> State Healthcare Institution Republican Clinical Hospital of the Ministry of Healthcare of Tatarstan Republic, 138 Orenburgsky tract, Kazan, 420064, Tatarstan Republic, Russia | 16 |
| Dr. Svetlana Sayutina      | State Budgetary Healthcare Institution of Irkutsk “Mark of Honour” Order Clinical Regional Hospital, 100 Yubileinii microdistrict, Irkutsk, 664079, Russia                                                                                                                                                                                                                                                                                                    | 16 |
| Dr. Liya Lukinykh          | Municipal Budgetary Healthcare Institution Vsevolozhskaya Clinical Central District Hospital<br>20 Koltushskoye shosse, Leningrad Region, Vsevolozhsk district, Vsevolozhsk, 188640, Russia                                                                                                                                                                                                                                                                   | 16 |
| Dr. Liubov Shpagina        | State Budgetary Healthcare Institution of Novosibirsk region “City Clinical Hospital#2”,<br>21, Polsunova str., Novosibirsk, Novosibirsk Region, 630051, Russia                                                                                                                                                                                                                                                                                               | 16 |
| Dr. Olga A. Dinisova       | State Budgetary Healthcare Institution of Novosibirsk region “City Clinical Hospital #1”,<br>6 bld, Zalesskogo str, Novosibirsk, Novosibirsk Region, 630047, Russia                                                                                                                                                                                                                                                                                           | 14 |
| Dr. Alexander Malygin      | State Healthcare Institution of Yaroslavl region Clinical Hospital #8;<br>39, Suzdalskoe shosse, Yaroslavl, 150030, Russia                                                                                                                                                                                                                                                                                                                                    | 14 |
| Prof. Ludmila Stakhovskaya | State Budgetary Educational Institution of High Professional Education “Russian National Research Medical University                                                                                                                                                                                                                                                                                                                                          | 13 |

|                          |                                                                                                                                                                                                                                                                                |    |
|--------------------------|--------------------------------------------------------------------------------------------------------------------------------------------------------------------------------------------------------------------------------------------------------------------------------|----|
|                          | named after N.I. Pirogov” of Ministry of Healthcare and Social Development of Russian Federation based on State Budgetary Healthcare Institution of Moscow city “City Clinical Hospital #31 of Moscow Healthcare Department”<br>42, Lobachevskogo str., Moscow, 119415, Russia |    |
| Dr. Vasily Vasilyuk      | Saint-Petersburg State Budgetary Institution of Healthcare “City Hospital #15”<br>4, Avangardnaya str.,<br>Saint-Petersburg, 198204, Russia                                                                                                                                    | 11 |
| Dr. Nikolay Gaiduk       | Saint Petersburg State Budgeted Healthcare Institution "City Alexandrovskaya Hospital", 4, Solidarnosti pr., St. Petersburg, 193312, Russia                                                                                                                                    | 10 |
| Dr. Nadezhda Korotkevich | State Budgetary Healthcare Institution of Kemerovo Regional "Kemerovo Regional Clinical Hospital",<br>22, Oktyabrsky prospect str., Kemerovo, Kemerovo region, 650066, Russia                                                                                                  | 8  |
| Dr. Natalia Vakhnina     | State Budgetary Healthcare Institution of Moscow city “City Clinical Hospital #61 of Moscow Healthcare Department”<br>15, Dovatora str., Moscow, 119048, Russia                                                                                                                | 6  |
| Prof. Marina Maximova    | Federal State Budgetary Institution “Scientific Research Centre of Neurology of RAMS”<br>80, Volokolamskoye shosse, Moscow, 125367, Russia                                                                                                                                     | 6  |
| Prof. Oleg Levin         | State Budgetary Healthcare Institution of Moscow city “City Clinical Hospital named after S.P. Botkin” of Moscow Healthcare Department<br>5, bld. 2, 2nd Botkinsky proezd, Moscow, 125284, Russia                                                                              | 5  |
| Prof. Larisa Volkova     | State Budgetary Healthcare Institution of Sverdlovsk region “Sverdlovsk Regional Clinical Hospital #1”<br>185, Volgogradskaya str., Ekaterinburg, 620102, Russia                                                                                                               | 5  |

|                          |                                                                                                                                                                                                                                                                                                                                                                          |   |
|--------------------------|--------------------------------------------------------------------------------------------------------------------------------------------------------------------------------------------------------------------------------------------------------------------------------------------------------------------------------------------------------------------------|---|
| Prof. Alla Guekht        | State Budgetary Healthcare Institution of Moscow city “City Clinical Hospital #12 of Moscow Healthcare Department”<br>26, Bakinskaya str, Moscow, 115516, Russia                                                                                                                                                                                                         | 4 |
| Dr. Ivan Sardaryan       | St. Petersburg State Budgeted Healthcare Institution City Mariinskaya Hospital<br>56 Liteyny pr., 191014, St. Petersburg, Russia                                                                                                                                                                                                                                         | 4 |
| Prof. Miroslav M. Odinak | Federal State Budgetary Military Educational Institution of Higher Professional Education "Military Medical Academy n.a. S.M. Kirov" of Ministry of Defense of the Russian Federation, Legal address: 6, lit. Z, Academician Lebedev str., St. Petersburg, 194044, Russia, Actual address: 2 Lesnoy pr., St. Petersburg, 194044, Russia                                  | 3 |
| Prof. Andrey Kovalenko   | Federal State Budgetary Institution Research Institute for Complex Issues of Cardiovascular Diseases under the Siberian Branch of The Russian Academy of Medical Sciences,<br>6, Sosnovy blvd., Kemerovo, Kemerovo region, 650002, Russia                                                                                                                                | 3 |
| Dr. Vadim Gusev          | State Budgetary Educational Institution of Higher Professional Education “Ural State Medical Academy” of Ministry of Health and Social Development of Russian Federation (3, Repin str., Ekaterinburg, 620028, Russia) based on Municipal Healthcare Institution “Central City Clinical Hospital # 23” 9, Starykh Bolshevikov str., Ekaterinburg, Russia, 620017, Russia | 3 |
| Prof. Eugene Gusev       | State Budgetary Educational Institution of High Professional Education “Russian National Research Medical University named after N.I. Pirogov” of Ministry of Healthcare and Social Development of Russian Federation based on State Budgetary Healthcare Institution of Moscow city “City Clinical Hospital # 1                                                         | 0 |

|                              |                                                                                                                                                                                                                                                                                                                                                                                                                                                                                                                                      |   |
|------------------------------|--------------------------------------------------------------------------------------------------------------------------------------------------------------------------------------------------------------------------------------------------------------------------------------------------------------------------------------------------------------------------------------------------------------------------------------------------------------------------------------------------------------------------------------|---|
|                              | named after N.I. Pirogov of Moscow Healthcare Department”<br>8, Leninsky prospect, Moscow, 119049, Russia                                                                                                                                                                                                                                                                                                                                                                                                                            |   |
| Prof. Valentina M. Alifirova | State Budgetary Educational Institution of Higher Professional Education “Siberia State Medical University” Ministry of Health and Social Development of Russian Federation,<br>2 Moskovsky trakt, Tomsk, Tomsk Region, 634050, Russia<br><u>Clinical base:</u> Regional State Budgetary Healthcare Institution Tomsk Regional Clinical Hospital                                                                                                                                                                                     | 0 |
| Prof. Semen V. Prokopenko    | State Education Institution of Higher Profession Education “Krasnoyarsk State Medical University named professor V.F.Voyno-Yasenetsky Department of Health and Social Development of Russian Federation”, 1, Partizana Zheleznijaka str., Krasnoyarsk, Krasnoyarsk Region, 660049, Russia<br>Clinical base: 1-Federal State Budgetary Institution of Healthcare “Siberian Clinical Centre of Federal Medico-Biological Agency”;<br>2- Municipal Budgetary Institution of Healthcare “City Clinical Hospital #6 named Karpovicha N.S. | 0 |
| Dr. Alexander Nazarov        | St. Petersburg State Budgeted Healthcare Institution City Elizavetinskaya Hospital<br>14 Vavilovykh str., 195257, St. Petersburg, Russia                                                                                                                                                                                                                                                                                                                                                                                             | 0 |
| <b>Kazakhstan</b>            |                                                                                                                                                                                                                                                                                                                                                                                                                                                                                                                                      |   |
| Dr. Erkyn Nurguzhayev        | State public institution under economic jurisdiction “City Clinical Hospital №7” of Almaty Health Administration microdistrict «Kalkaman», Almaty, 050006, Kazakhstan                                                                                                                                                                                                                                                                                                                                                                | 4 |
| <b>Belarus</b>               |                                                                                                                                                                                                                                                                                                                                                                                                                                                                                                                                      |   |



|                              |                                                                                                                            |    |
|------------------------------|----------------------------------------------------------------------------------------------------------------------------|----|
| Dr. Mikalai M. Bialauski     | Healthcare Institution "Vitebsk Regional Clinical Hospital"<br>37 Voinov Internationalistov str., 210037, Vitebsk, Belarus | 38 |
| Prof. Alena I. Mikhailava    | Institution "Gomel Regional Clinical Hospital"<br>5 Brat'ev Lizukovyh str., 246029 Gomel, Belarus                          | 26 |
| Prof. Natalya P. Mitkovskaya | Healthcare institution "City Clinical Emergency Hospital"<br>58 Kizhevatova str., 220024 Minsk, Belarus                    | 20 |
| Dr. Sergey D. Kulesh         | Healthcare Institution "Grodno Regional Clinical Hospital"<br>Leninskogo komsomola bulv., 52 230017 Grodno, Belarus        | 16 |
| Prof. Aliaksandr S. Fedulau  | Healthcare Institution "City Clinical Hospital #9"<br>8 Semashko str., 220116 Minsk, Belarus                               | 14 |

**Supplemental Table II: Full list of inclusion criteria**

| <b>On study entry</b>   |                                                                                                                                                                                                                               |
|-------------------------|-------------------------------------------------------------------------------------------------------------------------------------------------------------------------------------------------------------------------------|
| 1.                      | Had suffered a supra-tentorial ischemic stroke supported by computed tomography (CT) scan or magnetic resonance imaging (MRI) findings (in accordance with local practice)                                                    |
| 2.                      | Had provided written informed consent                                                                                                                                                                                         |
| 3.                      | Were male or female, aged 60 years or above                                                                                                                                                                                   |
| 4.                      | Were conscious and considered legally competent, but had symptoms or signs indicating cognitive impairment according to the investigator's opinion                                                                            |
| 5.                      | Had a score on the NIHSS between 3 and 18 (inclusive)                                                                                                                                                                         |
| 6.                      | Were capable of completing the MoCA scale and had a score of $\leq 25$ points with adjustment for level of education (4 to 9 school years $\leq 23$ points, 10 to 12 years $\leq 24$ points, 12 years $\leq 25$ points)       |
| 7.                      | If female, was post-menopausal or had been surgically sterilized/hysterectomized and did not intend to become pregnant during the course of the trial (e.g., oocyte implantation)                                             |
| 8.                      | If male, did not intend to induce pregnancy (parenthood was not desired) during clinical trial conduct or within 3 months after the last planned dose of IMP                                                                  |
| <b>At randomization</b> |                                                                                                                                                                                                                               |
| 9.                      | Were fully conscious                                                                                                                                                                                                          |
| 10.                     | Were still capable of completing the MoCA scale and had a score of $\leq 25$ points with adjustment for level of education (4 to 9 school years $\leq 23$ points, 10 to 12 years $\leq 24$ points, 12 years $\leq 25$ points) |
| 11.                     | Were able to perform the ADAS-cog+                                                                                                                                                                                            |

**Supplemental Table III: Full list of exclusion criteria**

| <b>On study entry</b> |                                                                                                                                                                                                                                                                                         |
|-----------------------|-----------------------------------------------------------------------------------------------------------------------------------------------------------------------------------------------------------------------------------------------------------------------------------------|
| 1.                    | A known medical history of dementia                                                                                                                                                                                                                                                     |
| 2.                    | A known medical history of or presence of major depression or psychotic disorder                                                                                                                                                                                                        |
| 3.                    | A known medical history or presence of malignancies or other serious/life-threatening diseases that were likely to cause the subject's death within 12 months                                                                                                                           |
| 4.                    | Concomitant acute coronary syndrome (e.g. acute myocardial infarction or unstable angina)                                                                                                                                                                                               |
| 5.                    | Suspected or diagnosed endocarditis                                                                                                                                                                                                                                                     |
| 6.                    | Thought to have had a cardioembolic stroke (e.g., atrial fibrillation, prosthetic valve) despite adequate treatment with anticoagulants                                                                                                                                                 |
| 7.                    | A suspicion of cerebral vasculitis as judged by the investigator                                                                                                                                                                                                                        |
| 8.                    | Stroke due to a complication of cerebral angiography, a revascularization procedure, or trauma                                                                                                                                                                                          |
| 9.                    | Evidence from imaging or pre-enrolment investigation of any diagnosis other than ischemic stroke likely to cause the presenting symptoms and signs (e.g., malignancy, hemorrhage)                                                                                                       |
| 10.                   | Treatment with thrombolytics, carotid surgery or neurosurgery during this index stroke or was indicated for such treatment                                                                                                                                                              |
| 11.                   | Indicated for investigation with carotid angiogram                                                                                                                                                                                                                                      |
| 12.                   | Abnormal clinically relevant screening laboratory values suggesting an undiagnosed disease requiring further clinical evaluation as assessed by the investigator                                                                                                                        |
| 13.                   | Neurological deficits deemed to interfere with the ability to adhere to the protocol (e.g. pronounced dysphasia)                                                                                                                                                                        |
| 14.                   | Current known alcohol or illicit drug abuse or dependence                                                                                                                                                                                                                               |
| 15.                   | A known medical history of Parkinson's disease, multiple sclerosis, uncontrolled epilepsy, or other neurological disorders severely affecting motor or cognitive function, in the opinion of the investigator                                                                           |
| 16.                   | A history of clinically significant allergies or idiosyncrasies to Actovegin                                                                                                                                                                                                            |
| 17.                   | In a dependency situation (e.g. kept in detention, investigator in the current trial, a first-degree relative of a clinical trial investigator, an employee at the clinical trial site, minor, or had a legal guardian), or were unable to understand and give written informed consent |

|                         |                                                                                                                                              |
|-------------------------|----------------------------------------------------------------------------------------------------------------------------------------------|
| 18.                     | Participation in another clinical trial with an investigational medicinal product (IMP) or device within 30 days of signing informed consent |
| <b>At randomization</b> |                                                                                                                                              |
| 19.                     | A suspicion of progressive stroke                                                                                                            |
| 20.                     | Eligibility for carotid angiogram, endarterectomy, or any neurosurgical intervention                                                         |
| 21.                     | A planned surgery or another procedure requiring general anesthesia                                                                          |
| 22.                     | A blood pressure at baseline of >220 mmHg (systolic) or 140 mmHg (diastolic)                                                                 |
| 23.                     | Taking any of the disallowed drugs following signing of the informed consent form (ICF)                                                      |

**Supplemental Table IV: Full list of medications prohibited during double-blind treatment**

|                                                                                                                                                                                                                                                                                                                                                                                                                                                                                                                                                                                                                                                                                                                                     |
|-------------------------------------------------------------------------------------------------------------------------------------------------------------------------------------------------------------------------------------------------------------------------------------------------------------------------------------------------------------------------------------------------------------------------------------------------------------------------------------------------------------------------------------------------------------------------------------------------------------------------------------------------------------------------------------------------------------------------------------|
| Peripheral vasodilators                                                                                                                                                                                                                                                                                                                                                                                                                                                                                                                                                                                                                                                                                                             |
| Amantadine derivatives                                                                                                                                                                                                                                                                                                                                                                                                                                                                                                                                                                                                                                                                                                              |
| <p>Psychoanaleptics in entirety, with the exception of antidepressants, including:</p> <ul style="list-style-type: none"> <li>• Centrally-acting sympathomimetics</li> <li>• Bicyclic compounds</li> <li>• Xanthine derivatives</li> <li>• Tricyclic units (this does not refer to tricyclic antidepressants but to tricyclic psychostimulants and nootropic compounds)</li> <li>• Other psychostimulants and nootropics (glycine exempted)</li> <li>• Antidepressants combined with psycholeptics</li> <li>• Psychostimulants combined with neuroleptics</li> <li>• Compounds for the treatment of dementia diseases, acetylcholinesterase inhibitors</li> <li>• Other compounds for the treatment of dementia diseases</li> </ul> |
| Parasympathomimetics, cholinesterase inhibitors                                                                                                                                                                                                                                                                                                                                                                                                                                                                                                                                                                                                                                                                                     |
| Cholinesters                                                                                                                                                                                                                                                                                                                                                                                                                                                                                                                                                                                                                                                                                                                        |
| Other parasympathomimetics                                                                                                                                                                                                                                                                                                                                                                                                                                                                                                                                                                                                                                                                                                          |
| Other compounds with effect on the nervous system                                                                                                                                                                                                                                                                                                                                                                                                                                                                                                                                                                                                                                                                                   |
| Gangliosides and ganglioside derivatives                                                                                                                                                                                                                                                                                                                                                                                                                                                                                                                                                                                                                                                                                            |
| Remaining compounds with effect on the nervous system                                                                                                                                                                                                                                                                                                                                                                                                                                                                                                                                                                                                                                                                               |
| Cerebrolysin                                                                                                                                                                                                                                                                                                                                                                                                                                                                                                                                                                                                                                                                                                                        |

**Supplemental Table V: All primary, secondary and safety endpoints**

| <b>Primary</b>                                                                                                                                                          |
|-------------------------------------------------------------------------------------------------------------------------------------------------------------------------|
| Change from baseline in ADAS-cog+ at 6 months                                                                                                                           |
| <b>Secondary</b>                                                                                                                                                        |
| Change from baseline in ADAS-cog+ at 3 and 12 months                                                                                                                    |
| Change from baseline in MoCA at end of infusion period, 3, 6, and 12 months                                                                                             |
| Proportion of ADAS-cog+ responders at 3, 6, and 12 months                                                                                                               |
| Diagnosis of dementia evaluated after 6 and 12 months classified according to International Statistical Classification and Related Health Problems, version 10 (ICD-10) |
| Change from baseline in NIHSS at end of infusion period, 3, 6, and 12 months                                                                                            |
| Barthel Index at 6 months                                                                                                                                               |
| EuroQoL EQ-5D at 6 and 12 months                                                                                                                                        |
| BDI-II at 3, 6, and 12 months                                                                                                                                           |
| <b>Safety</b>                                                                                                                                                           |
| Adverse events                                                                                                                                                          |
| Safety laboratory parameters                                                                                                                                            |
| Standard 12-lead ECG assessments                                                                                                                                        |
| Physical examination                                                                                                                                                    |
| Vital signs including blood pressure and heart rate                                                                                                                     |

ADAS-cog+: Alzheimer’s Disease Assessment Scale-cognitive subscale+; MoCA: Montreal Cognitive Assessment; NIHSS: National Institutes of Health Stroke Scale; ICD: International Classification of Diseases; BDI-II: Beck Depression Inventory version II; ECG: electrocardiogram.

**Supplemental Table VI: Key protocol deviations occurring in more than one patient**

| <b>Key deviation</b>                                                                                                                                                                                                | <b>Actovegin<br/>N=248<br/>n (%)</b> | <b>Placebo<br/>N=255<br/>n (%)</b> |
|---------------------------------------------------------------------------------------------------------------------------------------------------------------------------------------------------------------------|--------------------------------------|------------------------------------|
| <b>Any key deviation</b>                                                                                                                                                                                            | 36 (14.5)                            | 35 (13.7)                          |
| ADAS-Cog+ Visit 1, Task 7 was performed incorrectly. Correct 'yes' answers only were indicated on page 1                                                                                                            | 5 (2.0)                              | 5 (2.0)                            |
| Disallowed concomitant medication                                                                                                                                                                                   | 3 (1.2)                              | 2 (0.8)                            |
| Were taking any of the disallowed drugs following signing of the ICF                                                                                                                                                | 0                                    | 2 (0.8)                            |
| Visit 1 – Task 7 was performed incorrectly. Correct 'yes' answers only indicated on page 1                                                                                                                          | 7 (2.8)                              | 8 (3.2)                            |
| 'Number cancellation' test of the ADAS-Cog+ test on Visit 9 was conducted incorrectly. Duration of this test wasn't limited                                                                                         | 1 (0.4)                              | 3 (1.2)                            |
| 'Number cancellation' test of the ADAS-Cog+ test on Visit 1 was done by patients to the end, without time limitation. Investigators didn't calculate correct number that subject forgotten to strike out as 'wrong' | 5 (2.0)                              | 5 (2.0)                            |
| 'Number cancellation' test of the ADAS-Cog+ test on Visit 9 was done by patients to the end, without time limitation. Investigators didn't calculate correct number that subject forgotten to strike out as 'wrong' | 5 (2.0)                              | 5 (2.0)                            |

ADAS-cog+: Alzheimer's Disease Assessment Scale-cognitive subscale+; ICF: informed

consent form.

**Supplemental Table VII. Summary of primary and key secondary outcomes in the ITT population.**

|                                                                 | <b>Actovegin<br/>N=248</b> | <b>Placebo<br/>N=255</b> | <b>Actovegin versus<br/>placebo (95% CI)</b> |
|-----------------------------------------------------------------|----------------------------|--------------------------|----------------------------------------------|
| <b><i>ADAS-cog+ responders*</i></b>                             |                            |                          |                                              |
| Month 3 (n, %)                                                  | 127/215 (59.1%)            | 109/223 (48.9%)          | 10.2 (0.9, 19.5);<br>p=0.032                 |
| Month 6 (n, %)                                                  | 130/208 (62.5%)            | 113/216 (52.3%)          | 10.2 (0.8, 19.5);<br>p=0.034                 |
| Month 12 (n, %)                                                 | 138/200 (69.0%)            | 122/207 (58.9%)          | 10.1 (0.8, 19.3);<br>p=0.035                 |
| <b><i>MoCA score</i></b>                                        |                            |                          |                                              |
| Baseline (mean, SD)                                             | 18.8 (3.83)<br>n=248       | 18.6 (4.20)<br>n=255     | -                                            |
| Change from baseline<br>at Month 3                              | 3.4 (0.20)<br>n=224        | 2.7 (0.20)<br>n=234      | 0.7 (0.1, 1.2);<br>p=0.016                   |
| Change from baseline<br>at Month 6                              | 3.8 (0.21)<br>n=217        | 3.1 (0.21)<br>n=228      | 0.7 (0.2, 1.3);<br>p=0.013                   |
| Change from baseline<br>at Month 12                             | 3.9 (0.25)<br>n=211        | 2.9 (0.24)<br>n=220      | 1.0 (0.3, 1.7);<br>p=0.003                   |
| <b><i>NIHSS</i></b>                                             |                            |                          |                                              |
| Baseline (mean, SD)                                             | 5.3 (2.24)<br>n=248        | 5.6 (2.37)<br>n=255      | -                                            |
| Change from baseline<br>at Month 3                              | -2.9 (0.10)<br>n=224       | -2.7 (0.10)<br>n=235     | -0.2 (-0.5, 0.1);<br>p=0.136                 |
| Change from baseline<br>at Month 6                              | -3.2 (0.10)<br>n=219       | -3.2 (0.10)<br>n=228     | 0.0 (-0.3, 0.2);<br>p=0.890                  |
| Change from baseline<br>at Month 12                             | -3.5 (0.10)<br>n=211       | -3.4 (0.10)<br>n=220     | -0.1 (-0.4, 0.2);<br>p=0.455                 |
| <b><i>Dementia diagnosis (according to ICD-10 criteria)</i></b> |                            |                          |                                              |
| Month 6 (n, %)                                                  | 16/218<br>(7.3%)           | 24/228<br>(10.5%)        | -3.2 (-8.5, 2.1);<br>p=0.251                 |
| Month 12 (n, %)                                                 | 19/218<br>(8.7%)           | 29/228<br>(12.7%)        | -4.0 (-9.7, 1.7);<br>p=0.221                 |

Data are LS mean (SE) unless otherwise indicated.

\*A responder was defined as an improvement of 4 points or more on the ADAS-cog+ scale using Observed Case data.



**Supplemental Table VIII: Summary of EuroQol EQ-5D at 6 Months and 12 Months**

| EuroQol Category          | Month 6            |                  | Month 12           |                  |
|---------------------------|--------------------|------------------|--------------------|------------------|
|                           | Actovegin<br>N=248 | Placebo<br>N=255 | Actovegin<br>N=248 | Placebo<br>N=255 |
| Mobility, n (%)           |                    |                  |                    |                  |
| No problem                | 103 (41.5)         | 82 (32.2)        | 94 (37.9)          | 93 (36.5)        |
| Slight problem            | 74 (29.8)          | 81 (31.8)        | 77 (31.0)          | 75 (29.4)        |
| Moderate problem          | 31 (12.5)          | 42 (16.5)        | 31 (12.5)          | 30 (11.8)        |
| Severe problem            | 10 (4.0)           | 18 (7.1)         | 8 (3.2)            | 19 (7.5)         |
| Unable                    | 1 (0.4)            | 1 (0.4)          | 2 (0.8)            | 2 (0.8)          |
| Self-care, n (%)          |                    |                  |                    |                  |
| No problem                | 145 (58.5)         | 124 (48.6)       | 137 (55.2)         | 123 (48.2)       |
| Slight problem            | 49 (19.8)          | 65 (25.5)        | 55 (22.2)          | 60 (23.5)        |
| Moderate problem          | 19 (7.7)           | 25 (9.8)         | 15 (6.0)           | 24 (9.4)         |
| Severe problem            | 5 (2.0)            | 9 (3.5)          | 4 (1.6)            | 10 (3.9)         |
| Unable                    | 1 (0.4)            | 1 (0.4)          | 1 (0.4)            | 2 (0.8)          |
| Usual activities, n (%)   |                    |                  |                    |                  |
| No problem                | 81 (32.7)          | 84 (32.9)        | 81 (32.7)          | 79 (31.0)        |
| Slight problem            | 101 (40.7)         | 88 (34.5)        | 97 (39.1)          | 86 (33.7)        |
| Moderate problem          | 22 (8.9)           | 44 (17.3)        | 24 (9.7)           | 40 (15.7)        |
| Severe problem            | 10 (4.0)           | 6 (2.5)          | 7 (2.8)            | 11 (4.3)         |
| Unable                    | 5 (2.0)            | 2 (0.8)          | 3 (1.2)            | 3 (1.2)          |
| Pain or discomfort, n (%) |                    |                  |                    |                  |
| No pain                   | 124 (50.0)         | 118 (46.3)       | 116 (46.8)         | 119 (46.7)       |
| Slight pain               | 76 (30.6)          | 65 (25.5)        | 71 (28.6)          | 67 (26.3)        |
| Moderate pain             | 15 (6.0)           | 39 (15.3)        | 21 (8.5)           | 29 (11.4)        |

| EuroQol Category                     | Month 6            |                  | Month 12           |                  |
|--------------------------------------|--------------------|------------------|--------------------|------------------|
|                                      | Actovegin<br>N=248 | Placebo<br>N=255 | Actovegin<br>N=248 | Placebo<br>N=255 |
| Severe pain                          | 2 (0.8)            | 2 (0.8)          | 4 (1.6)            | 3 (1.2)          |
| Extreme pain                         | 1 (0.4)            | 0                | 0                  | 1 (0.4)          |
| Anxiety or depression, n (%)         |                    |                  |                    |                  |
| Not anxious                          | 124 (50.0)         | 123 (48.2)       | 120 (48.4)         | 120 (47.1)       |
| Slightly anxious                     | 77 (31.0)          | 75 (29.4)        | 78 (31.5)          | 69 (27.1)        |
| Moderately anxious                   | 15 (6.0)           | 24 (9.4)         | 12 (4.8)           | 27 (10.6)        |
| Severely anxious                     | 2 (0.8)            | 2 (0.8)          | 2 (0.8)            | 2 (0.8)          |
| Extremely anxious                    | 1 (0.4)            | 0                | 0                  | 1 (0.4)          |
| General health (on a scale of 0–100) |                    |                  |                    |                  |
| n                                    | 219                | 224              | 212                | 220              |
| Mean (SD)                            | 67.3 (16.04)       | 65 (16.82)       | 67.8 (15.87)       | 65.6 (17.51)     |
| Median                               | 70.0               | 65.0             | 70.0               | 70.0             |
| Min, max                             | 30.0, 100.0        | 25.0, 100.0      | 20.0, 100.0        | 20.0, 100.0      |

**Supplemental Table IX: Summary of patients with clinically significant chemistry laboratory values by visit (safety analysis set)**

| <b>Visit</b>  | <b>Analyte</b>                | <b>Actovegin<br/>N=250<br/>n (%)</b> | <b>Placebo<br/>N=253<br/>n (%)</b> |
|---------------|-------------------------------|--------------------------------------|------------------------------------|
| Screening     | Alanine aminotransferase      | 2 (0.8)                              | 0 (0.0)                            |
|               | Alkaline phosphatase          | 0 (0.0)                              | 1 (0.4)                            |
|               | Aspartate aminotransferase    | 1 (0.4)                              | 0 (0.0)                            |
|               | Bilirubin                     | 0 (0.0)                              | 1 (0.4)                            |
|               | Cholesterol                   | 17 (6.8)                             | 17 (6.7)                           |
|               | Creatine kinase               | 2 (0.8)                              | 4 (1.6)                            |
|               | Creatinine                    | 2 (0.8)                              | 1 (0.4)                            |
|               | Gamma-glutamyl-transpeptidase | 2 (0.8)                              | 8 (3.2)                            |
|               | HDL cholesterol               | 6 (2.4)                              | 7 (2.8)                            |
|               | LDL cholesterol               | 14 (5.6)                             | 17 (6.7)                           |
|               | Triglycerides                 | 11 (4.4)                             | 10 (4.0)                           |
| Month 6       | Alanine aminotransferase      | 1 (0.4)                              | 1 (0.4)                            |
|               | Alkaline phosphatase          | 1 (0.4)                              | 0 (0.0)                            |
|               | Aspartate aminotransferase    | 0 (0.0)                              | 1 (0.4)                            |
|               | Cholesterol                   | 12 (4.8)                             | 14 (5.5)                           |
|               | Creatine kinase               | 1 (0.4)                              | 0 (0.0)                            |
|               | Creatinine                    | 0 (0.0)                              | 1 (0.4)                            |
|               | Gamma-glutamyl-transpeptidase | 2 (0.8)                              | 3 (1.2)                            |
|               | HDL cholesterol               | 5 (2.0)                              | 3 (1.2)                            |
|               | LDL cholesterol               | 11 (4.4)                             | 15 (5.9)                           |
|               | Potassium                     | 2 (0.8)                              | 1 (0.4)                            |
| Triglycerides | 6 (2.4)                       | 8 (3.2)                              |                                    |

**Supplemental Table X: Summary of TEAEs related to chemistry laboratory results (safety analysis set)**

| <b>Preferred Term</b>                     | <b>Actovegin<br/>N=250<br/>n (%)</b> | <b>Placebo<br/>N=253<br/>n (%)</b> | <b>Total<br/>N=503<br/>n (%)</b> |
|-------------------------------------------|--------------------------------------|------------------------------------|----------------------------------|
| <b>Metabolism and nutrition disorders</b> |                                      |                                    |                                  |
| Dyslipidaemia                             | 8 (3.2)                              | 2 (0.8)                            | 10 (2.0)                         |
| Hyperkalaemia                             | 2 (0.8)                              | 1 (0.4)                            | 3 (0.6)                          |
| Hypercholesterolaemia                     | 0 (0.0)                              | 2 (0.8)                            | 2 (0.4)                          |
| Type 2 diabetes mellitus                  | 0 (0.0)                              | 1 (0.4)                            | 1 (0.2)                          |
| <b>Investigations</b>                     |                                      |                                    |                                  |
| Gamma glutamyltransferase increased       | 1 (0.4)                              | 2 (0.8)                            | 3 (0.6)                          |
| Alanine aminotransferase increased        | 0 (0.0)                              | 1 (0.4)                            | 1 (0.2)                          |
| Aspartate aminotransferase increased      | 0 (0.0)                              | 1 (0.4)                            | 1 (0.2)                          |
| Blood creatine phosphokinase increased    | 1 (0.4)                              | 0 (0.0)                            | 1 (0.2)                          |
| Blood homocysteine increased              | 1 (0.4)                              | 0 (0.0)                            | 1 (0.2)                          |

**Supplemental Table XI: Overview of TEAEs (safety analysis set)**

| <b>Number of patients with:</b>         | <b>Actovegin<br/>N=250<br/>n (%)</b> | <b>Placebo<br/>N=253<br/>n (%)</b> | <b>Total<br/>N=503<br/>n (%)</b> |
|-----------------------------------------|--------------------------------------|------------------------------------|----------------------------------|
| TEAEs                                   | 89 (35.6)                            | 96 (37.9)                          | 185 (36.8)                       |
| Number of TEAEs                         | 206                                  | 215                                | 421                              |
| Severe TEAEs                            | 11 (4.4)                             | 13 (5.1)                           | 24 (4.8)                         |
| SAEs                                    | 22 (8.8)                             | 17 (6.7)                           | 39 (7.8)                         |
| TEAEs leading to IMP<br>discontinuation | 21 (8.4)                             | 12 (4.7)                           | 33 (6.6)                         |
| TEAEs considered related to IMP         | 9 (3.6)                              | 9 (3.6)                            | 18 (3.6)                         |
| SAE deaths                              | 7 (2.8)                              | 6 (2.4)                            | 13 (2.6)                         |

**Supplemental Table XII: Overview of TEAEs related to recurrent cerebrovascular events (safety analysis set).**

| <b>Study phase</b> | <b>Preferred term</b>    | <b>Actovegin<br/>N=250</b> | <b>Placebo<br/>N=253</b> | <b>Total<br/>N=503</b> |
|--------------------|--------------------------|----------------------------|--------------------------|------------------------|
| Treatment phase    | Ischemic stroke/TIA      | 13 (5.2%)                  | 7 (2.8%)                 | 20 (4.0%)              |
|                    | Intracerebral hemorrhage | 1 (0.4%)                   | 0                        | 1 (0.2%)               |
|                    | Subtotal                 | 14<br>(5.6%)*              | 7 (2.8%)                 | 21 (4.2%)              |
| Follow-up phase    | Ischemic stroke          | 2 (0.8%)                   | 3 (1.2%)                 | 5 (1.0%)               |
| Total              |                          | 16 (6.4%)                  | 10 (4.0%)                | 26 (5.2%)              |

Data are n (%).

\*The odds ratio (95% CI) for cerebrovascular events on Actovegin compared to placebo was 2.09 (0.83, 5.26); p=0,124 suggesting this was not statistically significant (post-hoc analysis).

### **Randomization and masking Full Methods**

Patients were randomized to receive either Actovegin or placebo in a 1:1 ratio, without stratification and using a block size of four, by means of a computerized central randomization system, IVRS/IWRS. Before dispensing treatment, investigators reviewed all eligibility criteria and provided the IVRS/IWRS with the patient number, date of birth, and gender. Based on this information, patients were assigned to a kit number determined by the program. The infusion and tablet bottles were labelled and masked with a kit number generated by the randomization. During double-blind treatment and until end of follow-up, all investigators and patients were masked to treatment assignment.

### **Per protocol (PP) analyses**

The demographic and baseline characteristics for the PP analysis set were similar to those for the ITT set. The results of the ANCOVA for the PP analysis set (212 and 220 patients in the Actovegin and placebo groups respectively [196 and 202 respectively at 6 months) were supportive of the results of the primary analysis on the ITT set described: the LS mean (SE) change from baseline was -4.2 (0.60) for placebo and -6.4 (0.60) for Actovegin. The LS mean difference for Actovegin – placebo was -2.2, with an associated 95% CI (-3.9, -0.5), which was statistically significant in favour of Actovegin ( $p = 0.010$ ).

### **Further Safety Results**

Dyslipidemia was reported more frequently with Actovegin, compared with placebo during the study. All of these events were non-serious and did not lead to discontinuation from the study. Of note, the number of clinically significant chemistry laboratory values associated with cholesterol (low density lipoproteins) and triglycerides at month 6 was higher in the placebo group compared to Actovegin. Six (2.4%) deaths occurred in the placebo group and seven (2.8%) in the Actovegin group. All of the deaths were considered not related to the study medication. An overview of TEAEs is presented in Supplemental Table XI.

The noticeable difference in AEs leading to discontinuation from the study was due to recurrent stroke. However, during double-blind treatment, 21 patients (14 in the Actovegin group and seven in the placebo group) experienced cerebrovascular events (ischemic stroke, intracerebral hemorrhage and transient ischemic attack [TIA]). The odds ratio (95% CI) for cerebrovascular events on Actovegin compared to placebo was 2.09 (0.83, 5.26), suggesting this was not statistically significant (post-hoc analysis). Of these 21 patients, seven patients (2.8%) in the placebo group and 13 patients (5.2%) in the Actovegin group experienced recurrent ischemic stroke. Two patients in the placebo group and one patient in the Actovegin group had a fatal outcome as a result of this event; one patient in the Actovegin group experienced a fatal event of cerebral hemorrhage. Of seven patients in the placebo group, one patient experienced a non-serious cerebrovascular event, which was interpreted by the investigator as a transient ischemic attack. During the 6-month follow up, three patients in the placebo group and two patients in the Actovegin group discontinued due to recurrent ischemic stroke. Overall, 10 (4.0%) of 253 patients receiving placebo and 16 (6.4%) of 250 patients in the Actovegin group experienced cerebrovascular events. All cases of recurrent strokes were not related to the study medication (reported by investigators). A summary of TEAEs related to cerebrovascular events is presented in Supplemental Table XII.

### **Authors' contributions**

A.G., I.S., V.Z., and A.D.K were members of the steering committee that developed the concept and design of the study, approved the statistical plans, had full access to and interpreted the data, critically reviewed the report, and were responsible for the decision to submit for publication. S.E. oversaw the statistical analysis and critically reviewed the report.
