# Supplementary material for: ARTEMIDA Trial (A Randomized Trial of Efficacy, 12 Months International Double-Blind Actovegin): A Randomized Controlled Trial to Assess the Efficacy of Actovegin in Poststroke Cognitive Impairment
Source: PubMed Central journal article supplement — Stroke. 2017 Apr 24;48(5):1262–70. doi: 10.1161/STROKEAHA.116.014321 (PMC5404405; doi:10.1161/strokeaha.116.014321), 2017-04-24
Supplement: str-48-1262-s002.pdf [file str-48-1262-s002.pdf]

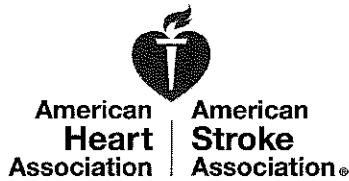

## Acknowledgment Permission Form

---

**Journal** Stroke

**Manuscript Number** STROKE/2016/014321

**First Author** Alla Guekht

**Title of Work** ARTEMIDA: a randomized controlled trial to assess the efficacy of Actovegin in post-stroke cognitive impairment

Authors must provide written permission/approval from all individuals mentioned by name in the Acknowledgments section of a submitted manuscript. By signing this form, any and all acknowledged persons therefore state that they have read and approved the mention of their names in the Acknowledgment section of the aforementioned paper.

|           |                          |                                                                                                     |                         |
|-----------|--------------------------|-----------------------------------------------------------------------------------------------------|-------------------------|
| Name (1)  | <u>Alexander Knyazev</u> | Signature <u>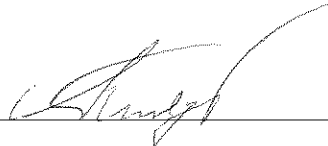</u> | Date <u>13 JAN 2017</u> |
| Name (2)  | <u></u>                  | Signature <u></u>                                                                                   | Date <u></u>            |
| Name (3)  | <u></u>                  | Signature <u></u>                                                                                   | Date <u></u>            |
| Name (4)  | <u></u>                  | Signature <u></u>                                                                                   | Date <u></u>            |
| Name (5)  | <u></u>                  | Signature <u></u>                                                                                   | Date <u></u>            |
| Name (6)  | <u></u>                  | Signature <u></u>                                                                                   | Date <u></u>            |
| Name (7)  | <u></u>                  | Signature <u></u>                                                                                   | Date <u></u>            |
| Name (8)  | <u></u>                  | Signature <u></u>                                                                                   | Date <u></u>            |
| Name (9)  | <u></u>                  | Signature <u></u>                                                                                   | Date <u></u>            |
| Name (10) | <u></u>                  | Signature <u></u>                                                                                   | Date <u></u>            |
| Name (11) | <u></u>                  | Signature <u></u>                                                                                   | Date <u></u>            |
| Name (12) | <u></u>                  | Signature <u></u>                                                                                   | Date <u></u>            |
| Name (13) | <u></u>                  | Signature <u></u>                                                                                   | Date <u></u>            |
| Name (14) | <u></u>                  | Signature <u></u>                                                                                   | Date <u></u>            |
| Name (15) | <u></u>                  | Signature <u></u>                                                                                   | Date <u></u>            |
| Name (16) | <u></u>                  | Signature <u></u>                                                                                   | Date <u></u>            |
| Name (17) | <u></u>                  | Signature <u></u>                                                                                   | Date <u></u>            |
| Name (18) | <u></u>                  | Signature <u></u>                                                                                   | Date <u></u>            |
| Name (19) | <u></u>                  | Signature <u></u>                                                                                   | Date <u></u>            |
| Name (20) | <u></u>                  | Signature <u></u>                                                                                   | Date <u></u>            |

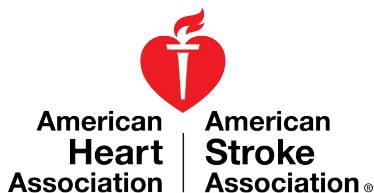

## Acknowledgment Permission Form

---

**Journal** \_\_\_\_\_

**Manuscript Number** \_\_\_\_\_

**First Author** \_\_\_\_\_

**Title of Work** \_\_\_\_\_

Authors must provide written permission/approval from all individuals mentioned by name in the Acknowledgments section of a submitted manuscript. By signing this form, any and all acknowledged persons therefore state that they have read and approved the mention of their names in the Acknowledgment section of the aforementioned paper.

|                 |                 |            |
|-----------------|-----------------|------------|
| Name (1) _____  | Signature _____ | Date _____ |
| Name (2) _____  | Signature _____ | Date _____ |
| Name (3) _____  | Signature _____ | Date _____ |
| Name (4) _____  | Signature _____ | Date _____ |
| Name (5) _____  | Signature _____ | Date _____ |
| Name (6) _____  | Signature _____ | Date _____ |
| Name (7) _____  | Signature _____ | Date _____ |
| Name (8) _____  | Signature _____ | Date _____ |
| Name (9) _____  | Signature _____ | Date _____ |
| Name (10) _____ | Signature _____ | Date _____ |
| Name (11) _____ | Signature _____ | Date _____ |
| Name (12) _____ | Signature _____ | Date _____ |
| Name (13) _____ | Signature _____ | Date _____ |
| Name (14) _____ | Signature _____ | Date _____ |
| Name (15) _____ | Signature _____ | Date _____ |
| Name (16) _____ | Signature _____ | Date _____ |
| Name (17) _____ | Signature _____ | Date _____ |
| Name (18) _____ | Signature _____ | Date _____ |
| Name (19) _____ | Signature _____ | Date _____ |
| Name (20) _____ | Signature _____ | Date _____ |



## Acknowledgment Permission Form

---

**Journal** \_\_\_\_\_

**Manuscript Number** \_\_\_\_\_

**First Author** \_\_\_\_\_

**Title of Work** \_\_\_\_\_

Authors must provide written permission/approval from all individuals mentioned by name in the Acknowledgments section of a submitted manuscript. By signing this form, any and all acknowledged persons therefore state that they have read and approved the mention of their names in the Acknowledgment section of the aforementioned paper.

|                 |                 |            |
|-----------------|-----------------|------------|
| Name (1) _____  | Signature _____ | Date _____ |
| Name (2) _____  | Signature _____ | Date _____ |
| Name (3) _____  | Signature _____ | Date _____ |
| Name (4) _____  | Signature _____ | Date _____ |
| Name (5) _____  | Signature _____ | Date _____ |
| Name (6) _____  | Signature _____ | Date _____ |
| Name (7) _____  | Signature _____ | Date _____ |
| Name (8) _____  | Signature _____ | Date _____ |
| Name (9) _____  | Signature _____ | Date _____ |
| Name (10) _____ | Signature _____ | Date _____ |
| Name (11) _____ | Signature _____ | Date _____ |
| Name (12) _____ | Signature _____ | Date _____ |
| Name (13) _____ | Signature _____ | Date _____ |
| Name (14) _____ | Signature _____ | Date _____ |
| Name (15) _____ | Signature _____ | Date _____ |
| Name (16) _____ | Signature _____ | Date _____ |
| Name (17) _____ | Signature _____ | Date _____ |
| Name (18) _____ | Signature _____ | Date _____ |
| Name (19) _____ | Signature _____ | Date _____ |
| Name (20) _____ | Signature _____ | Date _____ |

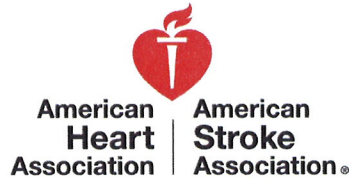

## Acknowledgment Permission Form

---

**Journal** Stroke

**Manuscript Number** STROKE/2016/014321

**First Author** Alla Guekht

**Title of Work** ARTEMIDA: a randomized controlled trial to assess the efficacy of Actovegin in post-stroke cognitive impairment

Authors must provide written permission/approval from all individuals mentioned by name in the Acknowledgments section of a submitted manuscript. By signing this form, any and all acknowledged persons therefore state that they have read and approved the mention of their names in the Acknowledgment section of the aforementioned paper.

|                                 |                                                                                                     |                       |
|---------------------------------|-----------------------------------------------------------------------------------------------------|-----------------------|
| Name (1) <u>Gediminas Puras</u> | Signature <u></u> | Date <u>13/1/2017</u> |
| Name (2) _____                  | Signature _____                                                                                     | Date _____            |
| Name (3) _____                  | Signature _____                                                                                     | Date _____            |
| Name (4) _____                  | Signature _____                                                                                     | Date _____            |
| Name (5) _____                  | Signature _____                                                                                     | Date _____            |
| Name (6) _____                  | Signature _____                                                                                     | Date _____            |
| Name (7) _____                  | Signature _____                                                                                     | Date _____            |
| Name (8) _____                  | Signature _____                                                                                     | Date _____            |
| Name (9) _____                  | Signature _____                                                                                     | Date _____            |
| Name (10) _____                 | Signature _____                                                                                     | Date _____            |
| Name (11) _____                 | Signature _____                                                                                     | Date _____            |
| Name (12) _____                 | Signature _____                                                                                     | Date _____            |
| Name (13) _____                 | Signature _____                                                                                     | Date _____            |
| Name (14) _____                 | Signature _____                                                                                     | Date _____            |
| Name (15) _____                 | Signature _____                                                                                     | Date _____            |
| Name (16) _____                 | Signature _____                                                                                     | Date _____            |
| Name (17) _____                 | Signature _____                                                                                     | Date _____            |
| Name (18) _____                 | Signature _____                                                                                     | Date _____            |
| Name (19) _____                 | Signature _____                                                                                     | Date _____            |
| Name (20) _____                 | Signature _____                                                                                     | Date _____            |

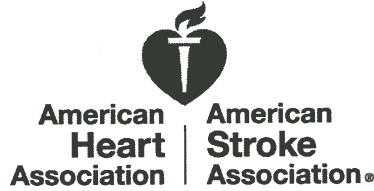

## Acknowledgment Permission Form

---

**Journal** Stroke

**Manuscript Number** STROKE/2016/014321

**First Author** Alla Guekht

**Title of Work** ARTEMIDA: a randomized controlled trial to assess the efficacy of Actovegin in post-stroke cognitive impairment

Authors must provide written permission/approval from all individuals mentioned by name in the Acknowledgments section of a submitted manuscript. By signing this form, any and all acknowledged persons therefore state that they have read and approved the mention of their names in the Acknowledgment section of the aforementioned paper.

|           |                          |                                      |                         |
|-----------|--------------------------|--------------------------------------|-------------------------|
| Name (1)  | <u>Alexander Kroll</u>   | Signature _____                      | Date _____              |
| Name (2)  | <u>Alexander Knyazev</u> | Signature _____                      | Date _____              |
| Name (3)  | <u>Ulf Vigonius</u>      | Signature <u><i>Ulf Vigonius</i></u> | Date <u>06-Feb-2017</u> |
| Name (4)  | <u>Martin Eeg</u>        | Signature _____                      | Date _____              |
| Name (5)  | <u>Gediminas Puras</u>   | Signature _____                      | Date _____              |
| Name (6)  | <u>Ella Palmer</u>       | Signature _____                      | Date _____              |
| Name (7)  | _____                    | Signature _____                      | Date _____              |
| Name (8)  | _____                    | Signature _____                      | Date _____              |
| Name (9)  | _____                    | Signature _____                      | Date _____              |
| Name (10) | _____                    | Signature _____                      | Date _____              |
| Name (11) | _____                    | Signature _____                      | Date _____              |
| Name (12) | _____                    | Signature _____                      | Date _____              |
| Name (13) | _____                    | Signature _____                      | Date _____              |
| Name (14) | _____                    | Signature _____                      | Date _____              |
| Name (15) | _____                    | Signature _____                      | Date _____              |
| Name (16) | _____                    | Signature _____                      | Date _____              |
| Name (17) | _____                    | Signature _____                      | Date _____              |
| Name (18) | _____                    | Signature _____                      | Date _____              |
| Name (19) | _____                    | Signature _____                      | Date _____              |
| Name (20) | _____                    | Signature _____                      | Date _____              |
