# Supplementary material for: ARTEMIDA Trial (A Randomized Trial of Efficacy, 12 Months International Double-Blind Actovegin): A Randomized Controlled Trial to Assess the Efficacy of Actovegin in Poststroke Cognitive Impairment
Source: PubMed Central journal article supplement — Stroke. 2017 Apr 24;48(5):1262–70. doi: 10.1161/STROKEAHA.116.014321 (PMC5404405; doi:10.1161/strokeaha.116.014321), 2017-04-24
Supplement: str-48-1262-s003.pdf [file str-48-1262-s003.pdf]

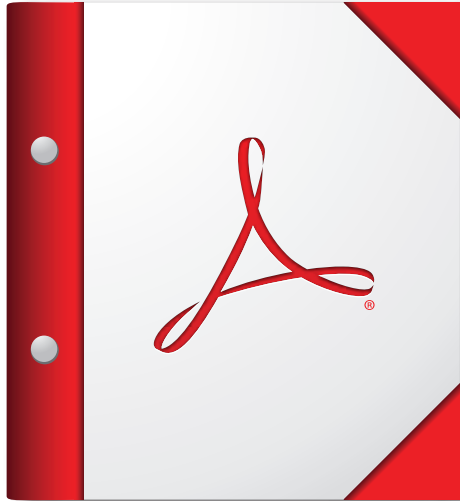

**For the best experience, open this PDF portfolio in  
Acrobat X or Adobe Reader X, or later.**

[Get Adobe Reader Now!](#)
